# Supplementary material for: Is Ultra-High Temperature Processed Milk Safe in Terms of Heterocyclic Aromatic Amines?
Source: MDPI journal article supplement (doi:10.3390/foods10061247), 2021-05-31
Supplement: s1 [file s1]

**Table S1.** The dry matter contents (%) and pH values of UHT milk samples classified according to their types and brands (mean  $\pm$  SD).

| Type                                     | Brand | n | Dry Matter (%)                | pH                           |
|------------------------------------------|-------|---|-------------------------------|------------------------------|
| Growing up milk                          | A     | 3 | 13.71 $\pm$ 0.41              | 6.88 $\pm$ 0.01 <sup>b</sup> |
|                                          | B     | 3 | 14.02 $\pm$ 0.05              | 6.87 $\pm$ 0.00 <sup>b</sup> |
|                                          | C     | 3 | 14.16 $\pm$ 0.19              | 6.94 $\pm$ 0.06 <sup>a</sup> |
|                                          | D     | 3 | 13.81 $\pm$ 0.05              | 6.97 $\pm$ 0.01 <sup>a</sup> |
| Sig.                                     |       |   | ns                            | **                           |
| Lactose free - semi skimmed              | B     | 3 | 9.59 $\pm$ 0.12               | 6.77 $\pm$ 0.01 <sup>a</sup> |
|                                          | D     | 3 | 9.78 $\pm$ 0.20               | 6.71 $\pm$ 0.01 <sup>b</sup> |
| Sig.                                     |       |   | ns                            | **                           |
| Protein fortified-coffee flavored milk*  | B     | 3 | 11.92 $\pm$ 0.02              | 6.82 $\pm$ 0.01              |
| Protein fortified-cacao flavored milk*   | D     | 3 | 10.59 $\pm$ 0.39 <sup>b</sup> | 6.73 $\pm$ 0.02 <sup>a</sup> |
|                                          | B     | 3 | 13.14 $\pm$ 0.19 <sup>a</sup> | 6.59 $\pm$ 0.02 <sup>b</sup> |
| Sig.                                     |       |   | **                            | **                           |
| Protein fortified-vanilla flavored milk* | D     | 3 | 11.11 $\pm$ 0.05 <sup>b</sup> | 6.83 $\pm$ 0.02 <sup>a</sup> |
|                                          | B     | 3 | 12.14 $\pm$ 0.04 <sup>a</sup> | 6.54 $\pm$ 0.06 <sup>b</sup> |
| Sig.                                     |       |   | **                            | **                           |
| Whole milk                               | E     | 3 | 10.94 $\pm$ 0.03 <sup>d</sup> | 6.81 $\pm$ 0.00 <sup>a</sup> |
|                                          | B     | 3 | 11.90 $\pm$ 0.05 <sup>a</sup> | 6.75 $\pm$ 0.01 <sup>b</sup> |
|                                          | D     | 3 | 11.26 $\pm$ 0.13 <sup>c</sup> | 6.75 $\pm$ 0.03 <sup>b</sup> |
|                                          | F     | 3 | 10.37 $\pm$ 0.06 <sup>c</sup> | 6.72 $\pm$ 0.01 <sup>b</sup> |
|                                          | G     | 3 | 11.48 $\pm$ 0.22 <sup>b</sup> | 6.75 $\pm$ 0.01 <sup>b</sup> |
| Sig.                                     |       |   | **                            | **                           |
| Organic milk                             | B     | 3 | 11.47 $\pm$ 0.16              | 6.83 $\pm$ 0.02 <sup>a</sup> |
|                                          | D     | 3 | 11.67 $\pm$ 0.09              | 6.77 $\pm$ 0.00 <sup>b</sup> |
| Sig.                                     |       |   | ns                            | *                            |
| Skimmed milk                             | B     | 3 | 8.87 $\pm$ 0.04 <sup>a</sup>  | 6.71 $\pm$ 0.01 <sup>b</sup> |
|                                          | D     | 3 | 8.24 $\pm$ 0.12 <sup>b</sup>  | 6.75 $\pm$ 0.01 <sup>a</sup> |
| Sig.                                     |       |   | **                            | **                           |
| Semi skimmed milk                        | A     | 3 | 10.12 $\pm$ 0.06 <sup>a</sup> | 6.71 $\pm$ 0.00 <sup>c</sup> |
|                                          | H     | 3 | 9.87 $\pm$ 0.03 <sup>b</sup>  | 6.71 $\pm$ 0.01 <sup>c</sup> |
|                                          | F     | 3 | 9.63 $\pm$ 0.10 <sup>c</sup>  | 6.75 $\pm$ 0.01 <sup>b</sup> |
|                                          | G     | 3 | 10.09 $\pm$ 0.01 <sup>a</sup> | 6.78 $\pm$ 0.00 <sup>a</sup> |
| Sig.                                     |       |   | **                            | **                           |

SD: standard deviation; Sig: significance; \*\*:  $p < 0.01$ ; \*:  $p < 0.05$ ; ns: not significant; a-e: means with different letters in the same column and belong to same type of milk are significantly different \*: all protein fortified milk samples were skimmed and lactose free.
